# Supplementary material
Source: MDPI journal article supplement (https://www.mdpi.com/2225-1154/11/3/68)

Table S1. Statistics for the linear trend of the considered time-series shown in Figure 6. We use the Sen Slope estimator and the Mann-Kendal test. The statistical test were carried out using the software R- 3.6.0 and the R package Modifiedmk. The variables are as follows: Tann - annual mean temperature; Pann- annual precipitation; Tamp - seasonal temperature amplitude; Tmonmax - warmest month temperature; Tmonmin - coldest month temperature; Pmonmax - monthly highest precipitation; Pmonmin - monthly lowest precipitation; AreaWintermax - area with maximum precipitation in the cold part of the year (October to March); AreaSummermin - area with minimum precipitation in the warm part of the year (April to September).

| Time-series      | Z-statistics | p-value     | Linear trend<br>(statistically<br>significant at $\alpha=0,05$ ) | Sen statistics for the<br>linear trend |
|------------------|--------------|-------------|------------------------------------------------------------------|----------------------------------------|
| <b>1901-2021</b> |              |             |                                                                  |                                        |
| Tann             | 5.99         | 0.000000002 | positive                                                         | 0,01 deg/year                          |
| Pann             | -0.66        | 0.51        | no                                                               | -0.16 mm/month.year                    |
| Pmonmax          | -0.12        | 0.91        | no                                                               | -0.004 mm/month.year                   |
| Pmonmin          | -2.23        | 0.03        | positive                                                         | -0.04 mm/month.year                    |
| Tamp             | -0.03        | 0.97        | no                                                               | -0.0003 deg/year                       |
| Tmonmin          | 3.17         | 0.002       | positive                                                         | 0.015 deg/year                         |
| Tmonmax          | 5.02         | 0.0000005   | positive                                                         | 0.014 deg/year                         |
| AreaWintermax    | -1.6         | 0.11        | no                                                               | -539 Sq.km/year                        |
| AreaSummermin    | -1.21        | 0.23        | no                                                               | -529 Sq.km/year                        |
| <b>1991-2021</b> |              |             |                                                                  |                                        |
| Tann             | 4.76         | 0.000002    | positive                                                         | 0.06 deg/year                          |
| Pann             | 1.33         | 0.18        | no                                                               | 3 mm/month.year                        |
| Pmonmax          | 0.85         | 0.4         | no                                                               | 0.18 mm/month.year                     |
| Pmonmin          | 0.2          | 0.84        | no                                                               | 0.05 mm/month.year                     |
| Tamp             | -0.17        | 0.87        | no                                                               | -0.01 deg/year                         |
| Tmonmin          | 2.0          | 0.04        | positive                                                         | 0.06 deg/year                          |
| Tmonmax          | 3.5          | 0.0005      | positive                                                         | 0.05 deg/year                          |
| AreaWintermax    | 1.05         | 0.29        | no                                                               | 3298 Sq.km/year                        |
| AreaSummermin    | 0.54         | 0.59        | no                                                               | 1721 Sq.km/year                        |

Figure S1. Spectral periodograms of the considered time-series shown in Figure 6. The variables are as follows: Tann - annual mean temperature; Pann- annual precipitation; Tamp - seasonal temperature amplitude; Tmonmax - warmest month temperature; Tmonmin - coldest month temperature; Pmonmax - monthly highest precipitation; Pmonmin - monthly lowest precipitation; AreaWintermax - area with maximum precipitation in the cold part of the year (October to March); AreaSummermin - area with minimum precipitation in the warm part of the year (April to September). The dashed line marks the period of 20 years, and the blue line marks the 95% confidence interval for the highest peak.

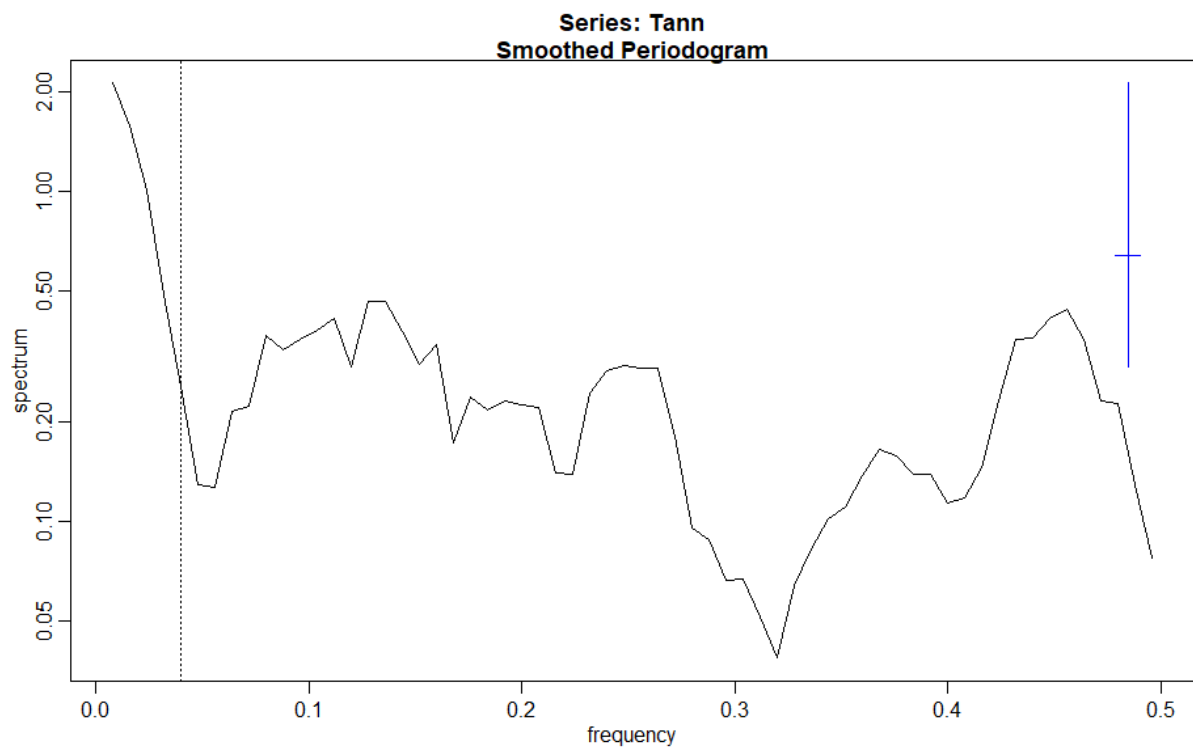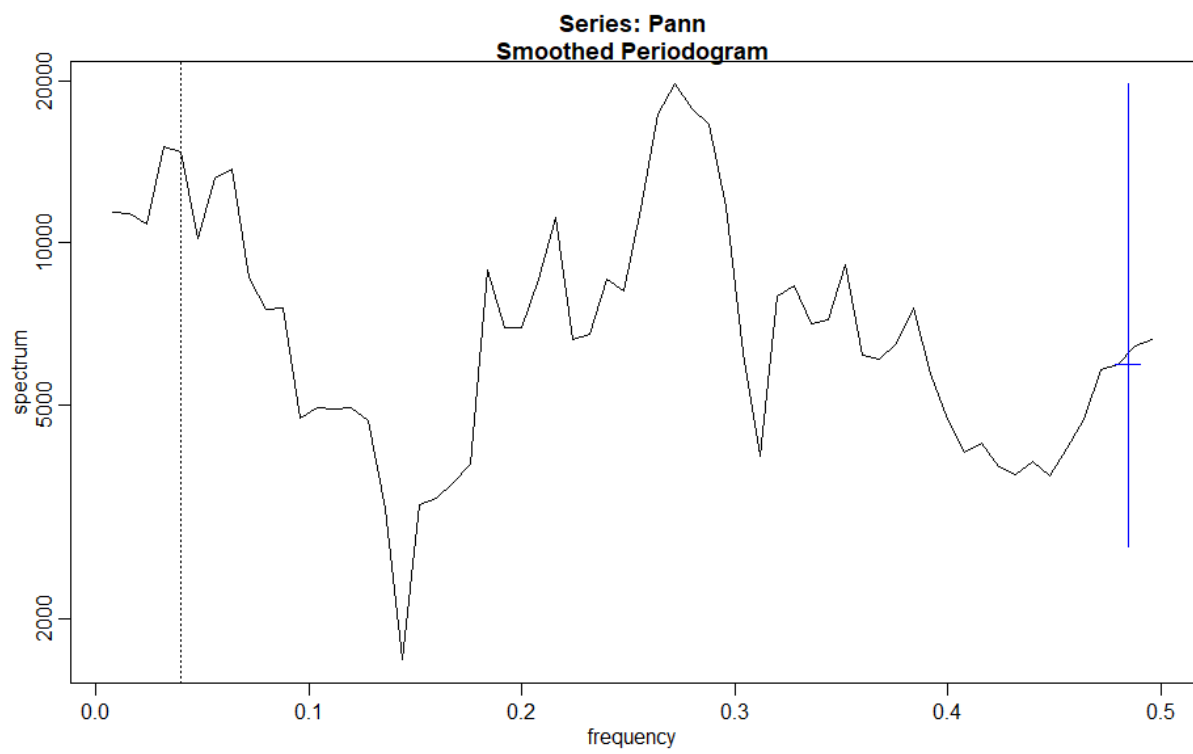

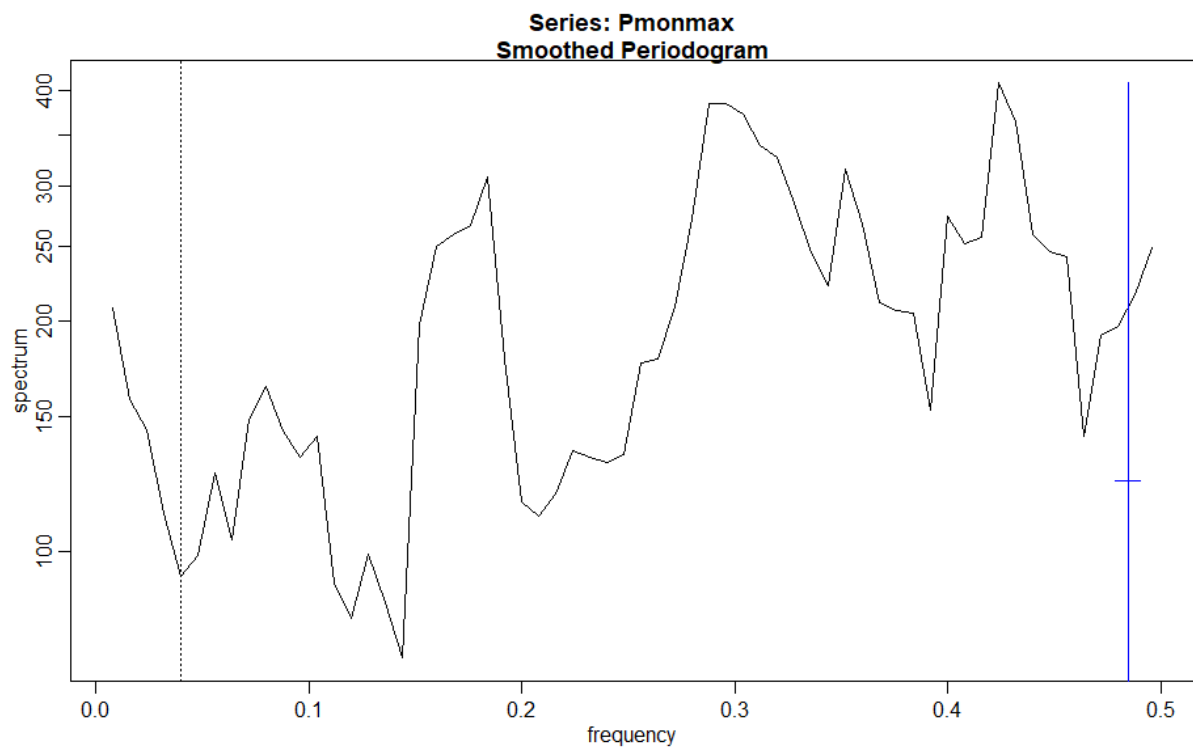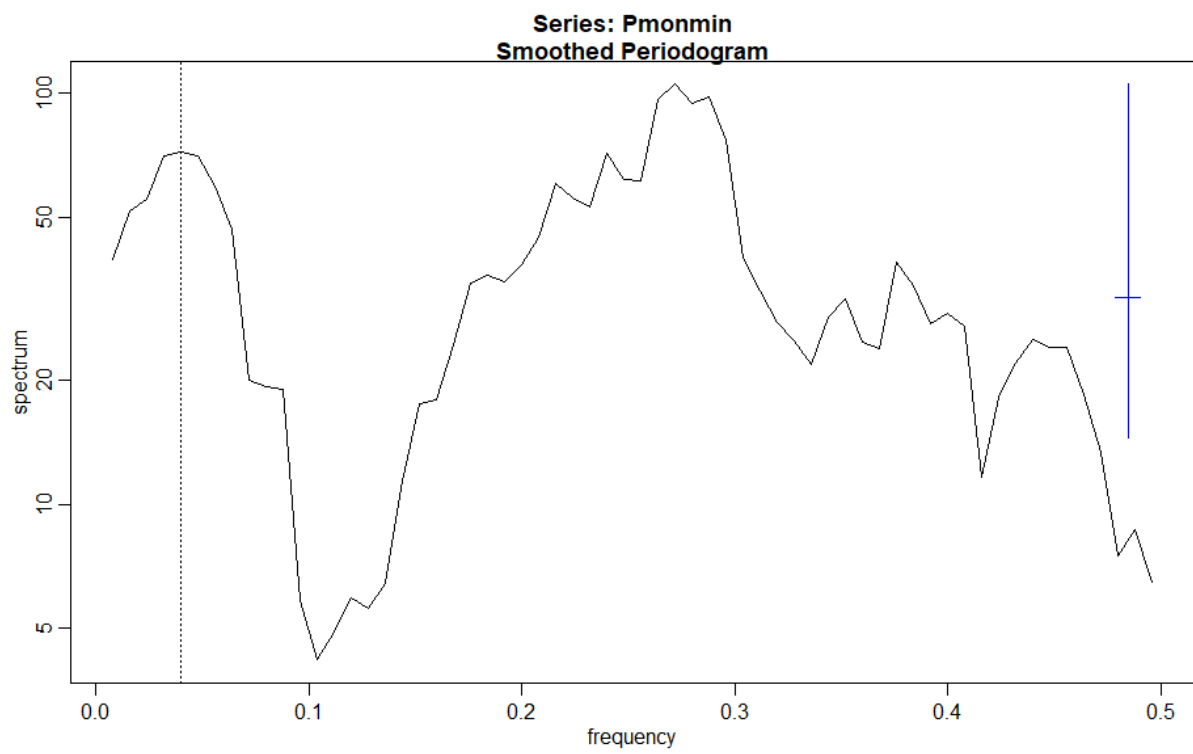

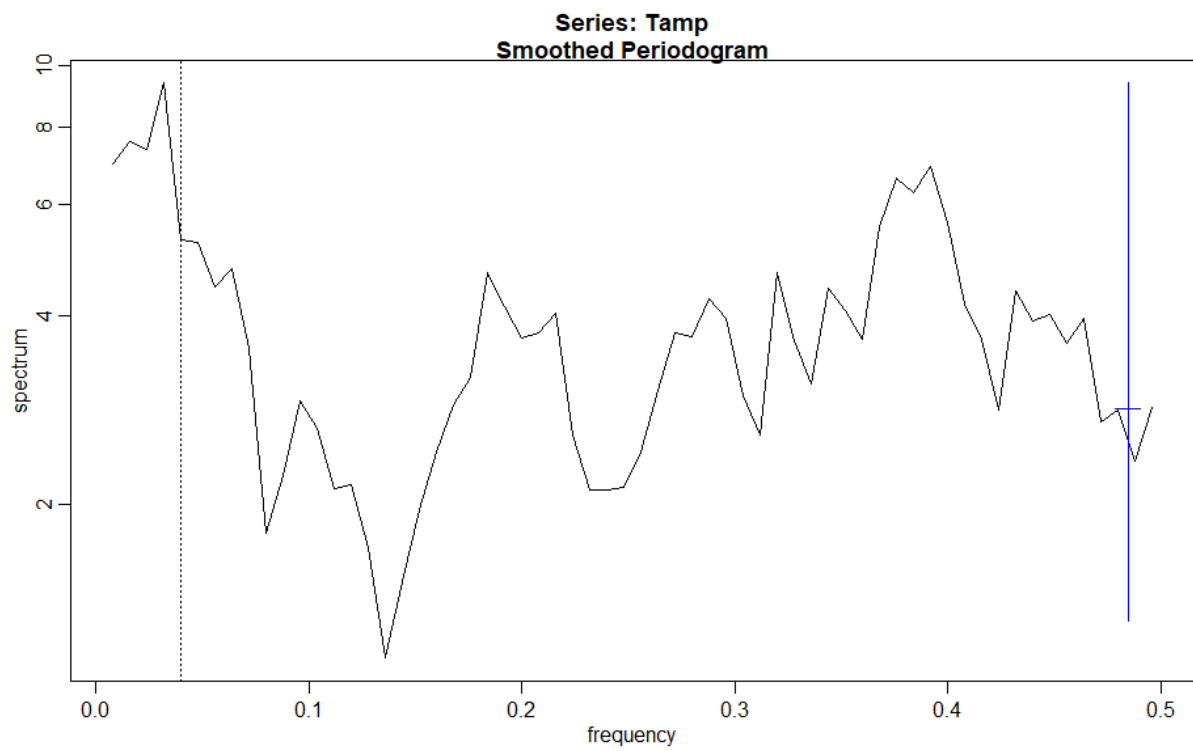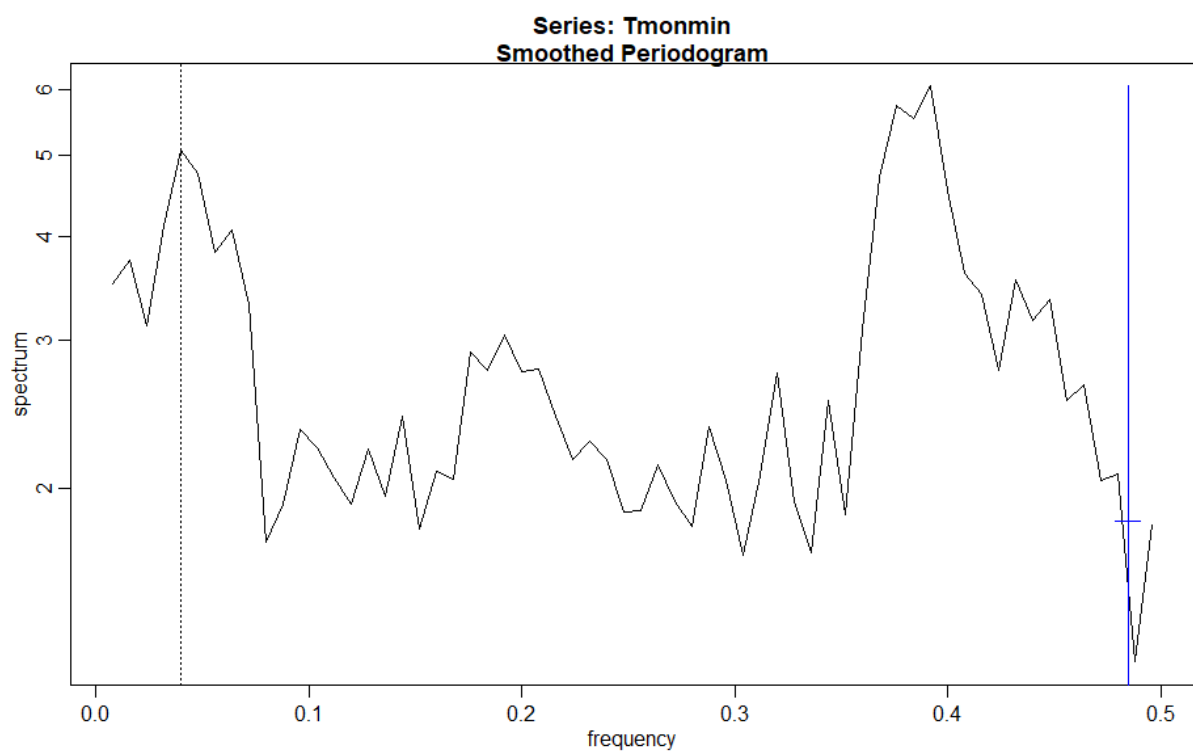

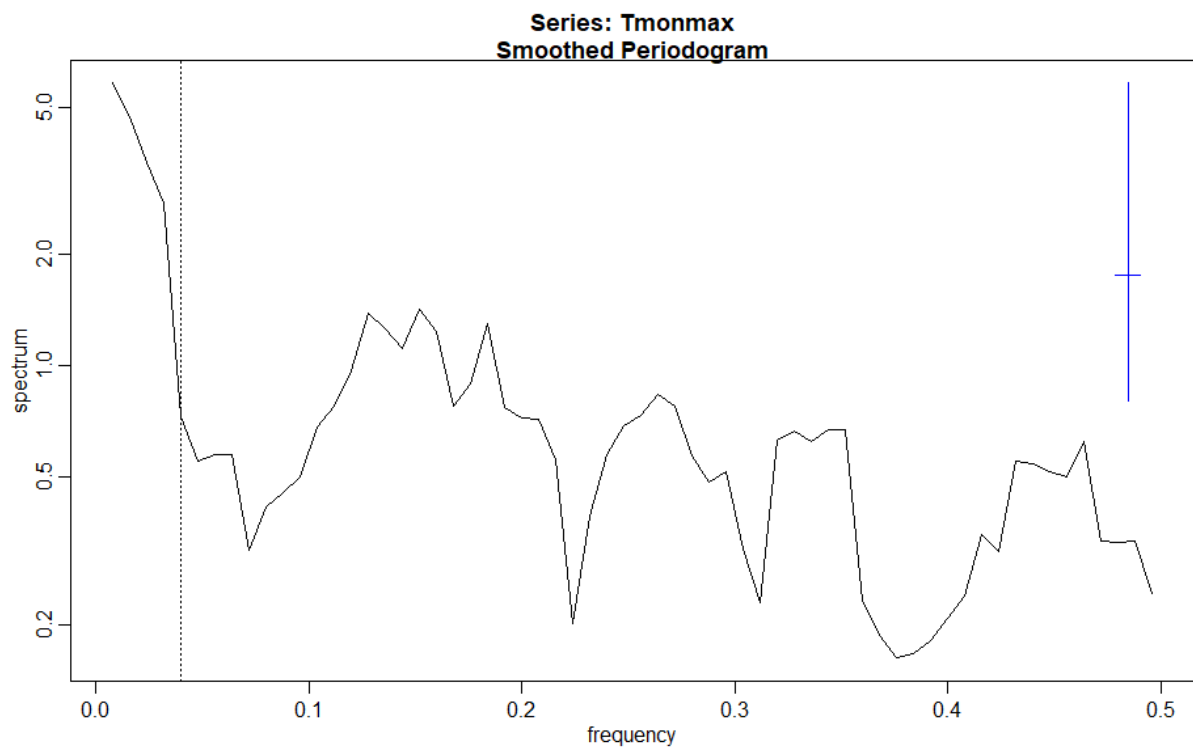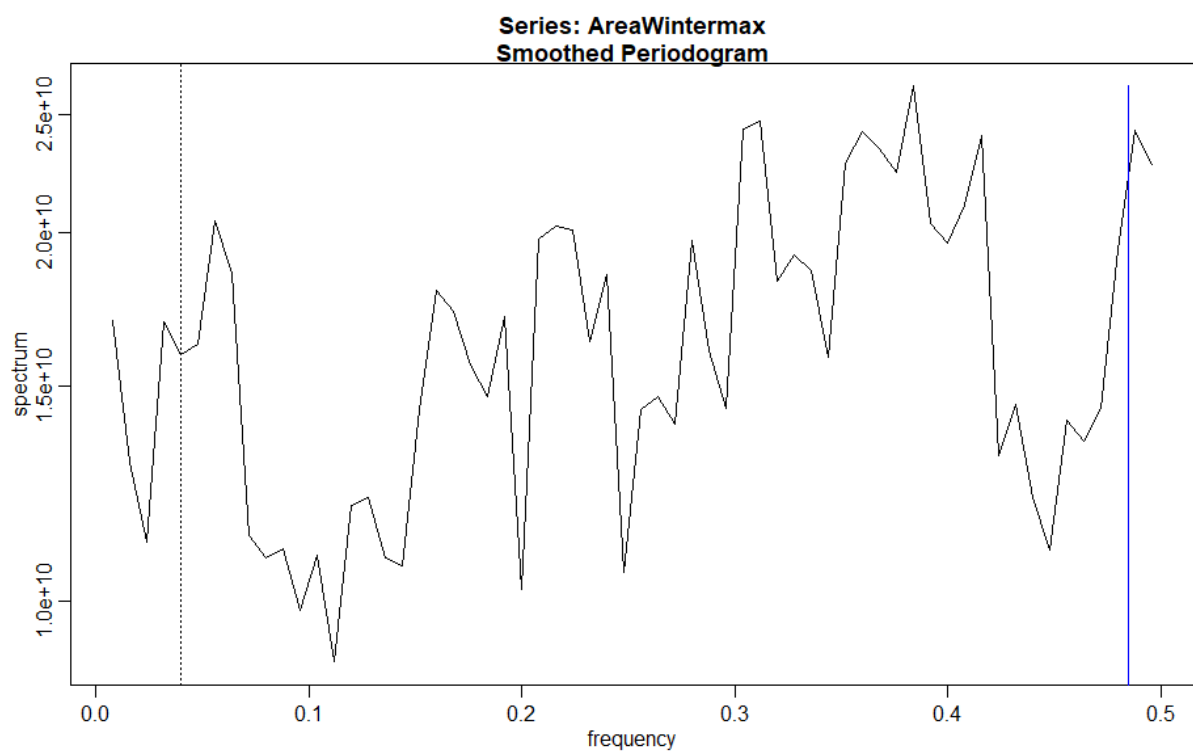

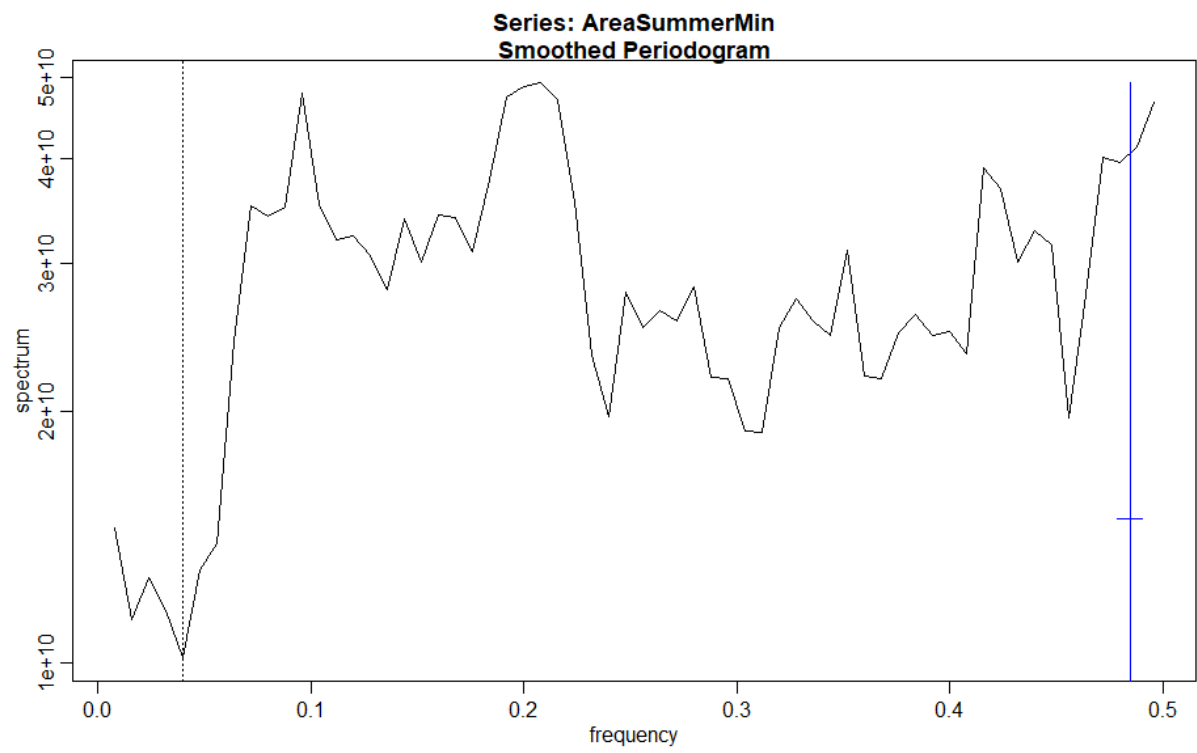

Supplement: s1 [file s1]
